# Supplementary material for: Partial Loss of Genomic Imprinting Reveals Important Roles for Kcnq1 and Peg10 Imprinted Domains in Placental Development
Source: PubMed Central journal article supplement (PMC4524636; doi:10.1371/journal.pone.0135202), 2015-08-04

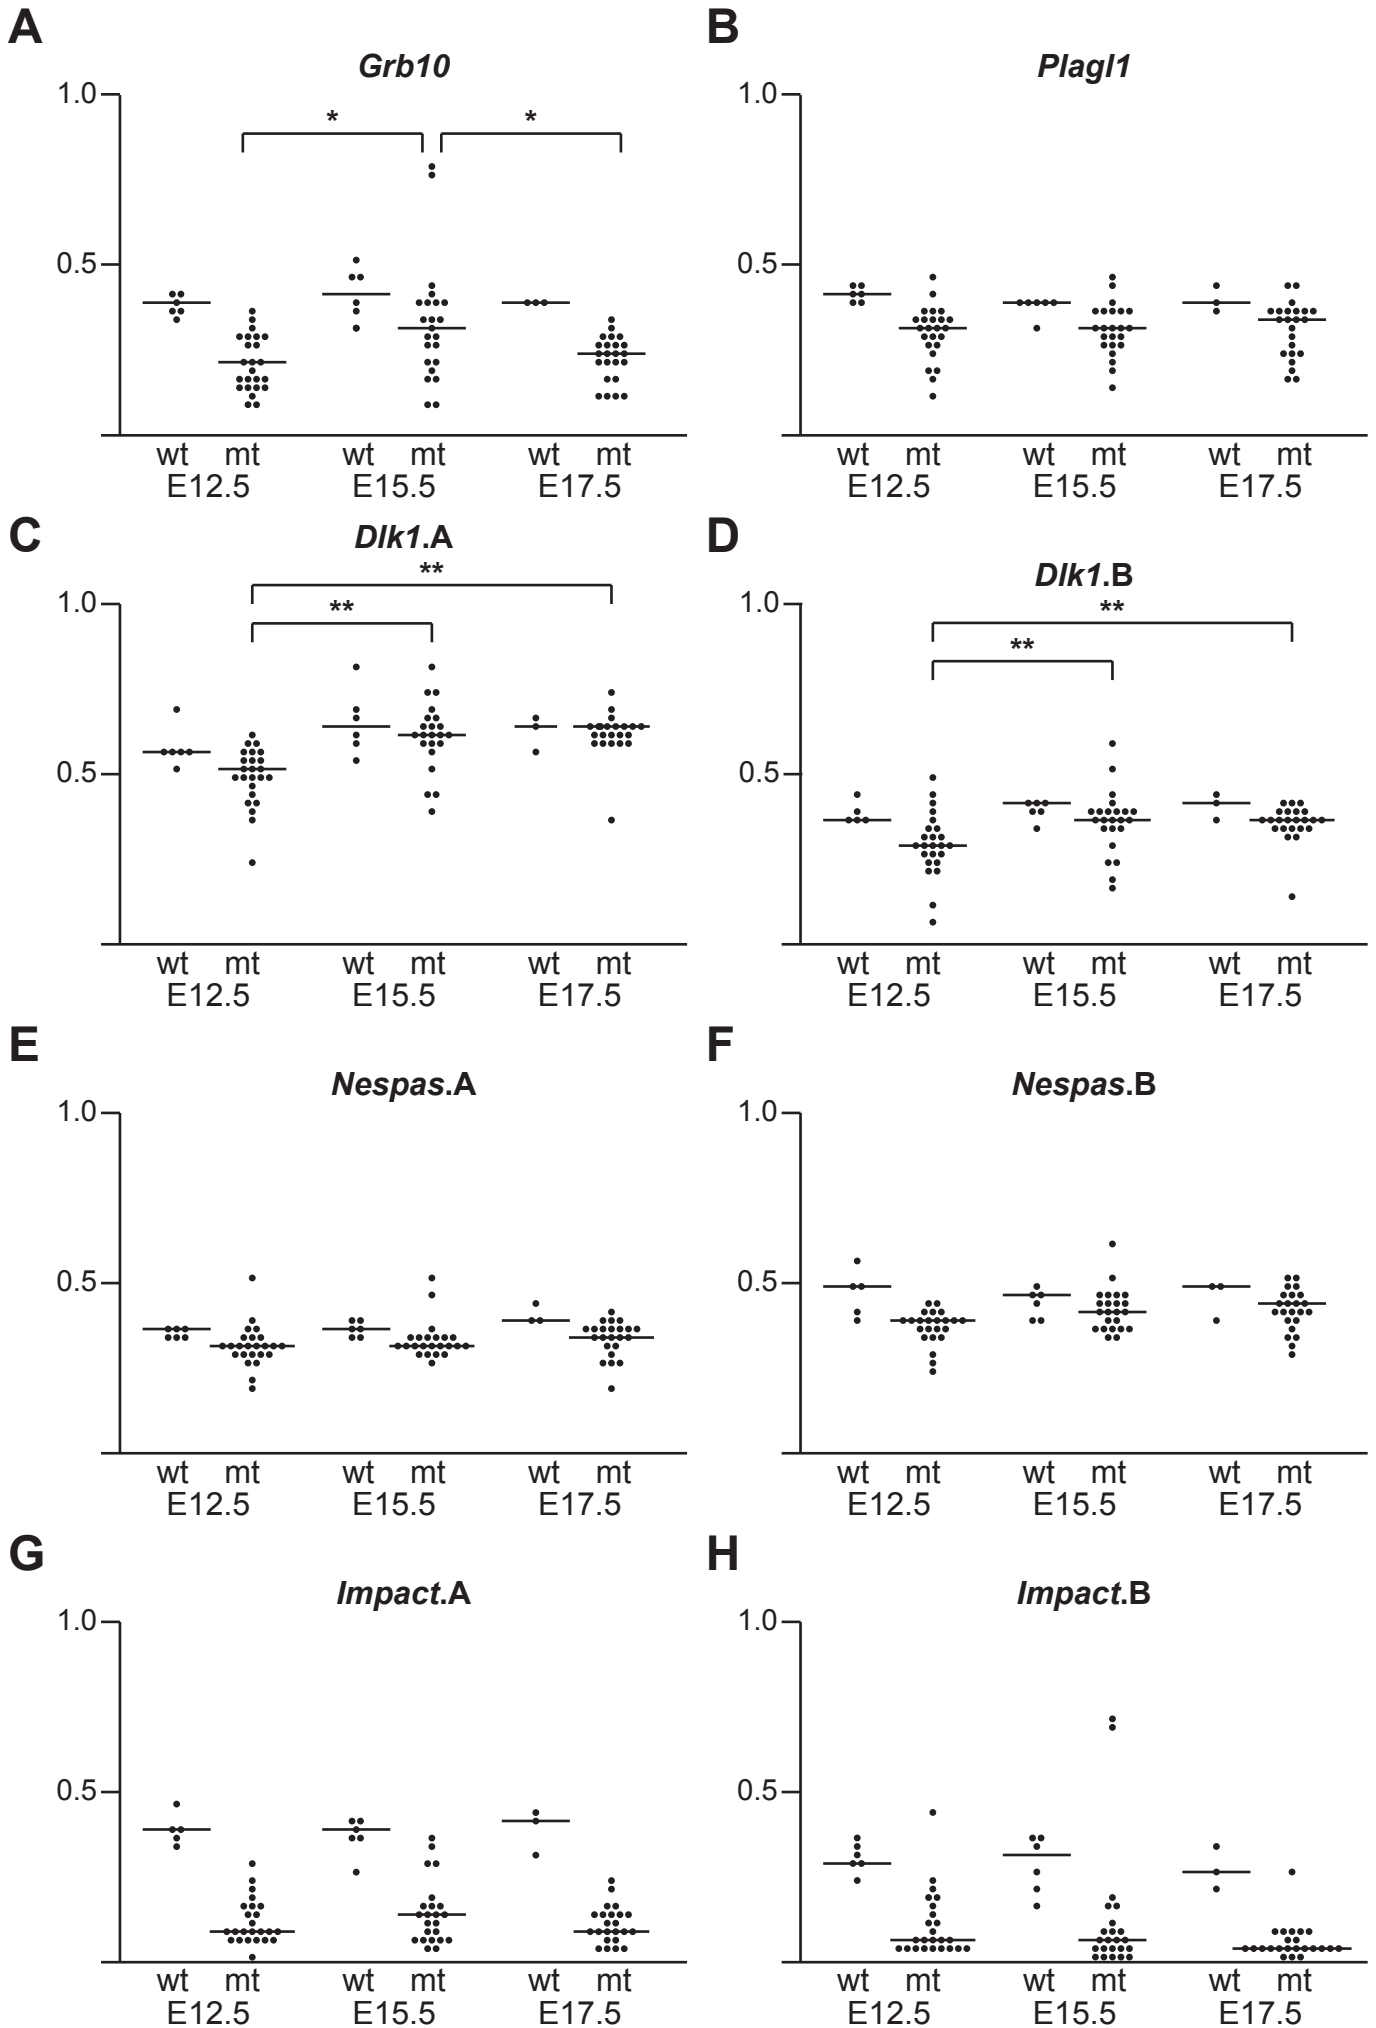

Supplement: pone.0135202.s001.pdf [file pone.0135202.s001.pdf]
