# Supplementary material for: Partial Loss of Genomic Imprinting Reveals Important Roles for Kcnq1 and Peg10 Imprinted Domains in Placental Development
Source: PubMed Central journal article supplement (PMC4524636; doi:10.1371/journal.pone.0135202), 2015-08-04
Supplement: pone.0135202.s015.pdf [file pone.0135202.s015.pdf]

## EpiTYPER Bisulfite PCR Amplicon Primer Sequence and Coordinates

| 5' Forward Tag         |                     | AGGAAGAGAG                      |                              |
|------------------------|---------------------|---------------------------------|------------------------------|
| 3' Reverse T7 Tag      |                     | CAGTAATACGACTCACTATAGGGAGAAGGCT |                              |
| Imprinted gDMD         | Sequence (5' to 3') |                                 | Genomic Coordinates (GRCm38) |
| <b><i>Dlk1.A</i></b>   | FWD                 | ATAGTATTGGTTTGGTATATATGGATG     | 12:109527424-109527853       |
|                        | REV                 | CCATAACATAAACATAAAAATCCACAA     |                              |
| <b><i>Dlk1.B</i></b>   | FWD                 | GATGTGTTGTGGATTTAGGTTGTAG       | 12:109528138-109528138       |
|                        | REV                 | ATCCCCTATACTCAAACATTCTCC        |                              |
| <b><i>Grb10</i></b>    | FWD                 | AGGAGTTGTTTATTATTTGGATTATTGT    | 11:12025702-12026046         |
|                        | REV                 | CTCTAAACTCCAAAACCCTTTTTCT       |                              |
| <b><i>H19</i></b>      | FWD                 | GTTGATGGTTTAGAATTTTATAAGTTAG    | 7:142581609-142581931        |
|                        | REV                 | CACAATACCACTAAAAAACAAAACA       |                              |
| <b><i>Igf2r</i></b>    | FWD                 | GATAGGAGGATTTAGAGGGTTTTGT       | 17:12742752-12743024         |
|                        | REV                 | AACCCCATATCTACAACCTCAAACA       |                              |
| <b><i>Impact.A</i></b> | FWD                 | TTTGTATTAAGTAGGTTGTTTTAGGG      | 18:12972913-12973111         |
|                        | REV                 | ACAACCAAACCTAAAATTAACCAAACAA    |                              |
| <b><i>Impact.B</i></b> | FWD                 | TTGTTTGGTTAATTTTAGTTTGGTT       | 18:12973084-12973497         |
|                        | REV                 | TCATATAACAATACAACAAAACCTACTC    |                              |
| <b><i>Kcnq1</i></b>    | FWD                 | TGGAGAGTTTTTTTGTTTAGTTTGG       | 7:150481809 -150481430       |
|                        | REV                 | CAAACCACCCCTACTTCTATAAAC        |                              |
| <b><i>Nespas.A</i></b> | FWD                 | TGGGGGTTTTTGTATTTTTTATTTTG      | 2:174295281-174295599        |
|                        | REV                 | TAAATCTCAACCACTAACCCACTCC       |                              |
| <b><i>Nespas.B</i></b> | FWD                 | TTTTTTTTAGGGTTTTGTAGGTTAGATTTG  | 2:174295985-174296393        |
|                        | REV                 | CCCCTCCTCCTTCTATTATAAACACC      |                              |
| <b><i>Mest</i></b>     | FWD                 | ATATGTTGGGGAGGGATTTTTTTAG       | 6:30737763-30738178          |
|                        | REV                 | CAACAAAACAACAACAACAACACTC       |                              |
| <b><i>Peg3</i></b>     | FWD                 | GATTTTGTGGGGTTTTTAATATTGAT      | 7:6683342 -6683054           |
|                        | REV                 | CCACCAACCCAAAATAAACATCTCT       |                              |
| <b><i>Plagl1</i></b>   | FWD                 | TATTTTTGTGGGGATGGAGGAATTA       | 10:13090467-13090791         |
|                        | REV                 | ATCCCAACCCAAACTAAATAACAAA       |                              |
| <b><i>Peg10</i></b>    | FWD                 | TTAGGATTTGGTTATTGAAGGTTTG       | 6:4697732 -4697319           |
|                        | REV                 | CCCCTCCTAAAATCTCTCTATATAAAC     |                              |

## EpiTYPER Bisulfite PCR Amplicon Primer Sequence and Coordinates

---

|                              |                                   |                                            |
|------------------------------|-----------------------------------|--------------------------------------------|
| <b>5' Forward Tag</b>        | AGGAAGAGAG                        |                                            |
| <b>3' Reverse T7 Tag</b>     | CAGTAATACGACTCACTATAGGGAGAAGGCT   |                                            |
| <b><u>Imprinted gDMD</u></b> | <b><u>Sequence (5' to 3')</u></b> | <b><u>Genomic Coordinates (GRCm38)</u></b> |
| <b><i>Snrpn</i></b>          | FWD                               | TGTGATGTTTGTAATTATTTGGGAG                  |
|                              | REV                               | CTAAAATCCACAAACCCAACTAACC                  |
| <b><i>Nnat</i></b>           | FWD                               | TTAGGTGGTAAGAGGGTATTTAAGG                  |
|                              | REV                               | AATACATACTCACCTACAACAACAC                  |
| <b><i>Nap115</i></b>         | FWD                               | AGTTTGGAATTTTTTTGTTAAATTTGG                |
|                              | REV                               | CAACTACAAAACCTCTCTAAACCAAC                 |
| <b><i>Commd1</i></b>         | FWD                               | GGTAAGGTAGATAATTATTGTTTTAGTTGT             |
|                              | REV                               | CATAAACCTACCCATACAATTACCC                  |
