# Supplementary material for: Partial Loss of Genomic Imprinting Reveals Important Roles for Kcnq1 and Peg10 Imprinted Domains in Placental Development
Source: PubMed Central journal article supplement (PMC4524636; doi:10.1371/journal.pone.0135202), 2015-08-04
Supplement: pone.0135202.s016.pdf [file pone.0135202.s016.pdf]

---

| Parameter                                 | Estimate | SE   | P-Value               |
|-------------------------------------------|----------|------|-----------------------|
| Intercept                                 | 310      | 36.8 | $3.54 \times 10^{-8}$ |
| <i>Kcnq1</i> Regression Coeff ( $\beta$ ) | -364     | 109  | $3.11 \times 10^{-3}$ |
| <i>Snrpn</i> Regression Coeff ( $\beta$ ) | -350     | 160  | $4.01 \times 10^{-2}$ |

---
