# Supplementary material for: Partial Loss of Genomic Imprinting Reveals Important Roles for Kcnq1 and Peg10 Imprinted Domains in Placental Development
Source: PubMed Central journal article supplement (PMC4524636; doi:10.1371/journal.pone.0135202), 2015-08-04
Supplement: pone.0135202.s017.pdf [file pone.0135202.s017.pdf]

---

| Placental Phenotype                                  | Imprinted gDMD  | Regression Coefficient | Significance (P-value) |
|------------------------------------------------------|-----------------|------------------------|------------------------|
| Fetal Viability                                      | <i>Nespas.B</i> | -1.05                  | $3.96 \times 10^{-2}$  |
| Spongiotrophoblast Central Volume (mm <sup>3</sup> ) | <i>Impact.B</i> | -7.72                  | $1.45 \times 10^{-2}$  |
|                                                      | <i>Mest</i>     | -4.49                  | $1.87 \times 10^{-2}$  |

---
