# Supplementary material for: Partial Loss of Genomic Imprinting Reveals Important Roles for Kcnq1 and Peg10 Imprinted Domains in Placental Development
Source: PubMed Central journal article supplement (PMC4524636; doi:10.1371/journal.pone.0135202), 2015-08-04
Supplement: pone.0135202.s018.pdf [file pone.0135202.s018.pdf]

---

| Placental Phenotype   | Imprinted gDMD | Regression Coefficient | Significance (P-value) |
|-----------------------|----------------|------------------------|------------------------|
| Placental Weight (mg) | <i>Dlk1.A</i>  | 116                    | $5.52 \times 10^{-2}$  |
| Fetal Weight (mg)     | <i>Igf2r</i>   | 2041                   | $3.82 \times 10^{-2}$  |
|                       | <i>Mest</i>    | 1668                   | $7.07 \times 10^{-2}$  |

---
